# Supplementary material for: Selection and Use of Online Learning Resources by First-Year Medical Students: Cross-Sectional Study
Source: PubMed Central journal article supplement (PMC5643842; doi:10.2196/mededu.7382), 2017-10-02
Supplement: mededu_v3i2e17_app1.pdf [file mededu_v3i2e17_app1.pdf]

*A. Curriculum resource types associated with timetabled learning activities.*

| <b>Type</b>       | <b>Description</b>                                                                                                                 |
|-------------------|------------------------------------------------------------------------------------------------------------------------------------|
| Lecture notes     | PDF notes created from lecture presentations (PowerPoint)                                                                          |
| Lecture recording | Video and/or audio capture files of lecture presentations including lecture slides and lecturer audio                              |
| Journal article   | Full text journal articles                                                                                                         |
| Textbook          | Electronic versions of key bioscience and biomedical textbooks                                                                     |
| Website           | Consumer, practitioner and researcher oriented websites                                                                            |
| Image             | Image files (often used to support CSL cases)                                                                                      |
| CSL case notes    | PDF notes containing details of CSL cases (separate files for first and second tutorials)                                          |
| CSL video         | Video clips designed to contextualize CSL cases                                                                                    |
| PCP roleplay      | PDF notes designed to support PCP roleplay exercises                                                                               |
| PCP video         | Video clips designed to support PCP learning activities (includes videos of physical examination and medical interview techniques) |
| Tutorial notes    | PDF notes containing details of non-CSL FBS tutorials                                                                              |
| Reading           | PDF or web notes designed to be read before specified lecture or tutorial activities                                               |
| Extras            | Collection of minor resource types                                                                                                 |

*B. Number of timetabled learning events and linked resources for the main types of events.*

| <b>Event type</b>   | <b>Events</b> | <b>Resources</b> |
|---------------------|---------------|------------------|
| All                 | 264           | 1079             |
| Lecture             | 170           | 721              |
| CSL tutorial        | 36            | 227              |
| PCP tutorial        | 18            | 66               |
| Practical           | 24            | 29               |
| Tutorial (other)    | 6             | 22               |
| Clinical colloquium | 6             | 14               |
| Other               | 4             | 0                |

*C. Number and use of resources linked to timetabled learning activities within the learning platform. Usage calculated as the total number of access requests divided by the number of resources.*

| <b>Resource type</b>     | <b>Resources</b> | <b>Use</b> |
|--------------------------|------------------|------------|
| All                      | 1079             | 53.8       |
| Lecture notes            | 191              | 166.9      |
| Lecture video (download) | 169              | 34.7       |
| (streaming)              | 169              | 9.4        |
| Lecture audio            | 169              | 2.8        |
| Journal article          | 87               | 48.8       |
| Textbook                 | 30               | 30.7       |
| Website                  | 51               | 23.3       |
| Image                    | 18               | 78.4       |
| CSL case notes           | 36               | 25.5       |
| CSL video                | 16               | 23.4       |
| PCP roleplay             | 36               | 55.7       |
| PCP video                | 30               | 51.5       |
| Tutorial notes           | 6                | 51.2       |
| Readings                 | 21               | 130.4      |
| Extras                   | 38               | 13.4       |
